# Supplementary material for: Anticancer Effects of Fucoxanthin in a PDX Model of Advanced Stage Pancreatic Cancer with Alteration of Several Multifunctional Molecules
Source: MDPI journal article supplement (doi:10.3390/onco3040016), 2023-09-24
Supplement: s1 [file s1]

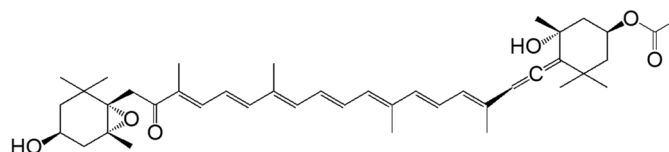

**Supplementary Figure S1.** A highly polar marine xanthophyll of fucoxanthin. Molecular weight, 658.91.

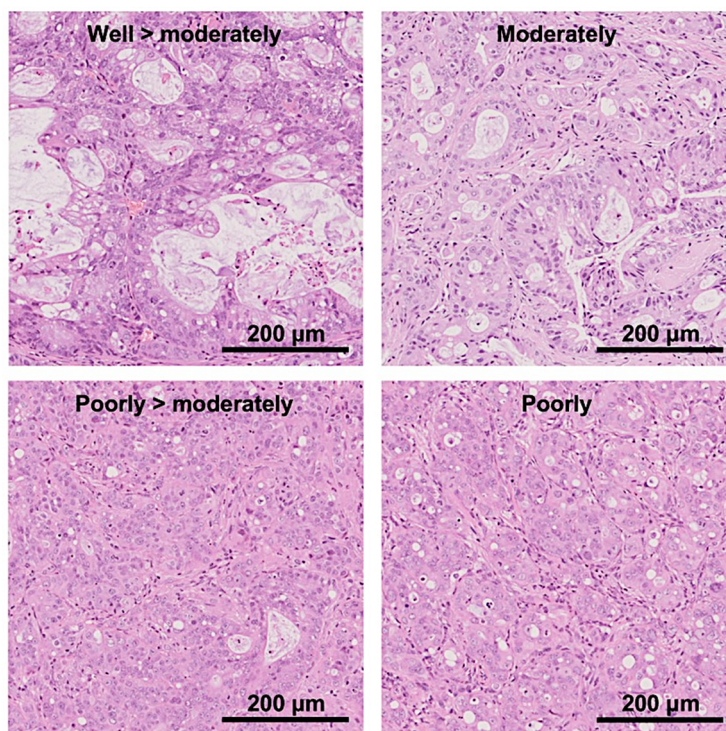

**Supplementary Figure S2.** Representative histopathology of pancreatic adenocarcinoma (ADC). Upper left panel, well > moderately differentiated ADC; Upper right, moderately differentiated ADC; Lower left panel, poorly > moderately differentiated ADC; Lower right panel, poorly differentiated ADC. Bar, 200 µm.
