# Supplementary material for: Anticancer Effects of Fucoxanthin in a PDX Model of Advanced Stage Pancreatic Cancer with Alteration of Several Multifunctional Molecules
Source: MDPI journal article supplement (doi:10.3390/onco3040016), 2023-09-24
Supplement: s1 [file s1]

**Supplementary Table S1.** Supporting information of each antibody.

| Antibodies (abbreviation)                                               | Source | Manufacturer              | City, etc             | Catalog number |
|-------------------------------------------------------------------------|--------|---------------------------|-----------------------|----------------|
| Insulin receptor (INSR)                                                 | Rabbit | BIOSS antibodies          | Wobum, MA, USA        | bs-0681R-TR    |
| BAG family molecular chaperone regulator 1 (BAG1)                       | Rabbit | Novus Biologicals         | Littleton, CO, USA    | NB100-56081SS  |
| Integrin beta-3 (ITGB3)                                                 | Rabbit | BIOSS antibodies          | Wobum, MA, USA        | bs-0342R-TR    |
| Transforming growth factor beta-1 proprotein (TGFB1)                    | Rabbit | BIOSS antibodies          | Wobum, MA, USA        | bs-4908R-TR    |
| Insulin-like growth factor-binding protein 3 (IGFBP3)                   | Rabbit | GeneTex                   | Irvine, CA, USA       | GTX100454      |
| Integrin alpha-1 (ITGA1)                                                | Rabbit | BIOSS antibodies          | Wobum, MA, USA        | bs-2095R-TR    |
| Laminin subunit alpha-5 (LAMA5)                                         | Rabbit | EpiGentek                 | Farmingdale, NY, USA  | #A59602        |
| Nectin-2 (NECTIN2)                                                      | Rabbit | BIOSS antibodies          | Wobum, MA, USA        | bs-2679R-TR    |
| Extracellular matrix protein 1 (ECM1)                                   | Rabbit | BIOSS antibodies          | Wobum, MA, USA        | bs-0776R-TR    |
| Hepatocyte nuclear factor 4-alpha (HNF4A)                               | Rabbit | BIOSS antibodies          | Wobum, MA, USA        | bs-3828R-TR    |
| Nuclear factor NF-kappa-B1 p105/p50 (NFκB1)                             | Rabbit | Cell Signaling technology | Danvers, MA, USA      | #12540         |
| Nuclear factor NF-kappa-B2 p100/p52 (NFκB2)                             | Rabbit | Cell Signaling technology | Danvers, MA, USA      | #3017          |
| Clusterin α (CLUα)                                                      | Rabbit | GeneTex                   | Irvine, CA, USA       | GTX134435      |
| Insulin-like growth factor-binding protein 2 (IGFBP2)                   | Rabbit | GeneTex                   | Irvine, CA, USA       | GTX128977      |
| Integrin alpha-3 (ITGA3)                                                | Rabbit | Affinity Biosciences      | Cincinnati, OH, USA   | AF5182         |
| Collagen alpha-1(XVII) chain (COL17A1)                                  | Rabbit | AVIVA System Biology      | San Diego, CA, USA    | OACD02624      |
| CD44 antigen (CD44)                                                     | Mouse  | Thermo Fisher Scientific  | Carlsbad, CA, USA     | #MS-668-P0     |
| Cdc42 effector protein 5 (CDC42EP5)                                     | Rabbit | Novus Biologicals         | Littleton, CO, USA    | NBP1-91773     |
| Metalloproteinase inhibitor 1 (TIMP1)                                   | Rabbit | BIOSS antibodies          | Wobum, MA, USA        | bs-0415R-TR    |
| Neutrophil gelatinase-associated lipocalin (LCN2)                       | Rabbit | Proteintech               | Rosemont, IL, USA     | 26991-1-AP     |
| Disintegrin and metalloproteinase domain-containing protein 17 (ADAM17) | Rabbit | BIOSS antibodies          | Wobum, MA, USA        | bs-4236R-TR    |
| Midkine (MDK)                                                           | Rabbit | GeneTex                   | Irvine, CA, USA       | GTX116089      |
| Epithelial cell adhesion molecule (EpCAM)                               | Mouse  | EXBIO Antibodies          | Praha, Czech Republic | 11-581-C025    |

|                                                                                                                                               |        |                           |                      |             |
|-----------------------------------------------------------------------------------------------------------------------------------------------|--------|---------------------------|----------------------|-------------|
| Dystroglycan 1 (DAG1)                                                                                                                         | Rabbit | GeneTex                   | Irvine, CA, USA      | GTX124225   |
| Matrix metalloproteinase-9 (MMP9)                                                                                                             | Mouse  | Thermo Fisher Scientific  | Carlsbad, CA, USA    | #MS-817-P0  |
| Mucin-5AC (MUC5AC)                                                                                                                            | Mouse  | Novus Biologicals         | Littleton, CO, USA   | NBP2-15196  |
| Heme oxygenase 1 (HO1)                                                                                                                        | Rabbit | StressMarq Biosciences    | Victoria, BC, Canada | SPC-112 C/D |
| FAS-associated factor 1 (FAF1)                                                                                                                | Rabbit | Novus Biologicals         | Littleton, CO, USA   | NBP1-76745  |
| Desmin (DES)                                                                                                                                  | Rabbit | BIOSS antibodies          | Wobum, MA, USA       | bs-1026R-TR |
| Tescalcin (TESC)                                                                                                                              | Rabbit | Novus Biologicals         | Littleton, CO, USA   | NBP2-94798  |
| Ras association (RalGDS/AF-6) domain family (N-terminal) member 9 (RASSF9)                                                                    | Rabbit | ATLAS Antibodies          | Stockholm, Sweden    | HPA039428   |
| PDZ and LIM domain 3 (PDLIM3)                                                                                                                 | Rabbit | GeneTex                   | Irvine, CA, USA      | GTX119708   |
| integrin alpha 7 (ITGA7)                                                                                                                      | Rabbit | BIOSS antibodies          | Wobum, MA, USA       | bs-1816R-TR |
| insulin-like growth factor 2 (IGF2)                                                                                                           | Rabbit | BIOSS antibodies          | Wobum, MA, USA       | bs-0015R-TR |
| Integrin alpha-5 (Integrin $\alpha$ 5)                                                                                                        | Rabbit | GeneTex                   | Irvine, CA, USA      | GTX130705   |
| Integrin beta-5 (Integrin $\beta$ 1)                                                                                                          | Rabbit | GeneTex                   | Irvine, CA, USA      | GTX128839   |
| Phosphorylated focal adhesion kinase(Tyr <sup>397</sup> ) {pFAK(Tyr <sup>397</sup> )}                                                         | Rabbit | GeneTex                   | Irvine, CA, USA      | GTX24803    |
| Phosphorylated Paxillin(Tyr <sup>31</sup> ) {pPaxillin(Tyr <sup>31</sup> )}                                                                   | Rabbit | Novex                     | San Diego, CA, USA   | 44-720G     |
| Phosphorylated protein kinase B(Ser <sup>473</sup> ) {pAKT(Ser <sup>473</sup> )}                                                              | Rabbit | Cell Signaling technology | Danvers, MA, USA     | #4060       |
| Phosphorylated protein kinase B(Thr <sup>308</sup> ) {pAKT(Thr <sup>308</sup> )}                                                              | Rabbit | Cell Signaling technology | Danvers, MA, USA     | #2965       |
| Signal transducer and activator of transcription 3(Ser <sup>727</sup> ) {pSTAT3(Ser <sup>727</sup> )}                                         | Rabbit | Cell Signaling technology | Danvers, MA, USA     | #9134       |
| Transforming growth factor $\beta$ 1 (TGF- $\beta$ 1)                                                                                         | Rabbit | BIOSS antibodies          | Wobum, MA, USA       | bs-0086R    |
| Phosphorylated-Smad2(Ser <sup>465/467</sup> ) {pSmad2(Ser <sup>465/467</sup> )}                                                               | Rabbit | GeneTex                   | Irvine, CA, USA      | GTX133614   |
| Phosphorylated-MAPK/ERK kinase 1/2(Ser <sup>217/221</sup> ) {pMEK1/2(Ser <sup>217/221</sup> )}                                                | Rabbit | Cell Signaling technology | Danvers, MA, USA     | #9154       |
| Phosphorylated-Extracellular-regulated kinase 1/2(Thr <sup>202</sup> /Tyr <sup>204</sup> ) {pERK1/2(Thr <sup>202</sup> /Tyr <sup>204</sup> )} | Rabbit | Cell Signaling technology | Danvers, MA, USA     | #4370       |

|                                                             |     |        |                           |                   |              |
|-------------------------------------------------------------|-----|--------|---------------------------|-------------------|--------------|
| Phosphorylated-p38(Thr <sup>180</sup> /Tyr <sup>182</sup> ) | {p- | Rabbit | GeneTex                   | Irvine, CA, USA   | GTX133460    |
| Phosphorylated-JNK(Thr <sup>183</sup> /Tyr <sup>185</sup> ) | {p- | Rabbit | GeneTex                   | Irvine, CA, USA   | GTX635799    |
| $\beta$ -Catenin                                            |     | Rabbit | Cell Signaling technology | Danvers, MA, USA  | #9582        |
| c-MYC                                                       |     | Rabbit | Cell Signaling technology | Danvers, MA, USA  | #9402        |
| Cyclin D1                                                   |     | Rabbit | Cell Signaling technology | Danvers, MA, USA  | #2978        |
| Cyclin B1                                                   |     | Rabbit | GeneTex                   | Irvine, CA, USA   | GTX100911    |
| P21                                                         |     | Rabbit | BIOSS antibodies          | Wobum, MA, USA    | bs-10129R-TR |
| Matrix metalloproteinase-2 (MMP-2)                          |     | Rabbit | BIOSS antibodies          | Wobum, MA, USA    | bs-4605R-TR  |
| $\alpha$ -Smooth muscle actin ( $\alpha$ SMA)               |     | Rabbit | Cell Signaling technology | Danvers, MA, USA  | #34105       |
| E-Cadherin                                                  |     | Rabbit | GeneTex                   | Irvine, CA, USA   | GTX100443    |
| N-Cadherin                                                  |     | Rabbit | GeneTex                   | Irvine, CA, USA   | GTX127345    |
| Vimentin                                                    |     | Rabbit | GeneTex                   | Irvine, CA, USA   | GTX132610    |
| TP53                                                        |     | Mouse  | Thermo Fisher Scientific  | Carlsbad, CA, USA | #MS-105-P0   |
| Caspase-3                                                   |     | Rabbit | GeneTex                   | Irvine, CA, USA   | GTX110543    |
| $\beta$ -Actin                                              |     | Rabbit | GeneTex                   | Irvine, CA, USA   | GTX109639    |

**Supplementary Table S2.** Profile of four amino acid substitution polymorphisms in a pancreatic adenocarcinoma of a patient.<sup>1</sup>

| Gene symbol     | Locus <sup>2</sup> | Variant class | Gene Class       | Type | Nucleotide Change | Allele frequency (%) | Amino acid Change   |
|-----------------|--------------------|---------------|------------------|------|-------------------|----------------------|---------------------|
| <i>TP53</i>     | 17: 7577568        | Hotspot       | Loss of function | Sn   | c.713G>A          | 99.5                 | p.Cys238Tyr         |
| <i>KRAS</i>     | 12: 25398284       | Hotspot       | Gain of function | Sn   | c.35G>A           | 49.1                 | p.Gly12Asp          |
| <i>ARID1A</i>   | 1: 27105833        | Truncating    | Loss of function | Del  | c.5445delG        | 17.0                 | p.Ile1816SerfsTer67 |
| <i>NOTCH2NL</i> | 1: 120612002       | Truncating    | Loss of function | Del  | c.-39436CCG>G     | 50.2                 | p. <sup>3</sup>     |

<sup>1</sup> Among all 161 most relevant cancer genes, 2 single nucleotide polymorphisms (Sn) and 2 deletions (Del) were found by using OncoPrint Comprehensive Assay v3 with workflows on Ion Chef System plus Ion Torrent Genexus system. <sup>2</sup> Chromosome: its position. <sup>3</sup>Not identified.

**Supplementary Table S3.** Incidence (%) of different differentiated adenocarcinoma (ADC) in patient-derived pancreatic cancer tissue-transplanted xenograft (PC-PDX) mice administered fucoxanthin (Fx).

| Group no. | Treatment (No. of mice) | Well-moderately differentiated ADC <sup>a</sup> | Moderately differentiated ADC <sup>b</sup> | Moderately-poorly differentiated ADC <sup>c</sup> | Total ADC |
|-----------|-------------------------|-------------------------------------------------|--------------------------------------------|---------------------------------------------------|-----------|
| 1         | Fx (9)                  | 55.6%*                                          | 44.4%                                      | 0%**                                              | 100%      |
| 3         | Control (9)             | 0%                                              | 33.3%                                      | 66.7%                                             | 100%      |

<sup>a</sup> It is comprised of well > moderately (4 mice) and well < moderately (1 mouse) differentiated ADCs. These lesions were only detected in group 1 <sup>b</sup> It is moderately differentiated ADC alone. <sup>c</sup> It is comprised of poorly (2 mice) and poorly > moderately (4 mice) differentiated ADCs. These lesions were only detected in group 3. Significant difference for Fisher's exact probability test: \* $P < 0.05$  and \*\* $P < 0.01$  from group 3. Group 1, fucoxanthin-high diet administered mice; group 3, control diet administered mice.

**Supplementary Table S4.** Profile of upregulated proteins identified by LC-MS/MS in whole tumor tissue of patient-derived pancreatic cancer tissue-transplanted xenograft (PC-PDX) mice administered fucoxanthin (Fx).<sup>1</sup>

| Gene symbol | Description                                                                     | Fold change <sup>2</sup> |
|-------------|---------------------------------------------------------------------------------|--------------------------|
| HSPA1L      | Heat shock 70 kDa protein 1-like                                                | 76.6                     |
| PRMT5       | Protein arginine N-methyltransferase 5                                          | 24.6                     |
| TBC1D2B     | TBC1 domain family member 2B                                                    | 15.5                     |
| TNXB        | Tenascin-X                                                                      | 15.5                     |
| NEK9        | Serine/threonine-protein kinase Nek9                                            | 14.9                     |
| NAAA        | N-acyl ethanolamine-hydrolyzing acid amidase                                    | 14.8                     |
| TGFBR2      | TGF-beta receptor type-2                                                        | 11.7                     |
| MTOR        | Serine/threonine-protein kinase mTOR                                            | 9.5                      |
| HSBP1       | Heat shock factor-binding protein 1                                             | 7.7                      |
| ILVBL       | 2-hydroxyacyl-CoA lyase 2                                                       | 7.5                      |
| F13A1       | Coagulation factor XIII A chain                                                 | 7.1                      |
| APBB1IP     | Amyloid beta A4 precursor protein-binding family B member 1-interacting protein | 7.0                      |
| UNC119B     | Protein unc-119 homolog B                                                       | 6.7                      |
| PEX1        | Peroxisome biogenesis factor 1                                                  | 6.7                      |
| GFPT2       | Glutamine--fructose-6-phosphate aminotransferase [isomerizing] 2                | 5.8                      |
| KRI1        | Protein KRI1 homolog                                                            | 5.7                      |
| PCOLCE      | Procollagen C-endopeptidase enhancer 1                                          | 5.5                      |
| CCDC90B     | Coiled-coil domain-containing protein 90B, mitochondrial                        | 5.5                      |
| ISG20       | Interferon-stimulated gene 20 kDa protein                                       | 5.5                      |
| YKT6        | Synaptobrevin homolog YKT6                                                      | 5.4                      |
| DOCK2       | Dedicator of cytokinesis protein 2                                              | 5.1                      |
| COL6A6      | Collagen alpha-6(VI) chain                                                      | 5.1                      |
| TACO1       | Translational activator of cytochrome c oxidase 1                               | 4.9                      |
| FUT8        | Alpha-(1,6)-fucosyltransferase                                                  | 4.8                      |
| OSBPL9      | Oxysterol-binding protein-related protein 9                                     | 4.8                      |

|         |                                                                        |     |
|---------|------------------------------------------------------------------------|-----|
| PRORS1P | Putative prolyl-tRNA synthetase associated domain-containing protein 1 | 4.8 |
| CMTR1   | Cap-specific mRNA (nucleoside-2'-O-)-methyltransferase 1               | 4.7 |
| NHLRC2  | NHL repeat-containing protein 2                                        | 4.5 |
| AXL     | Tyrosine-protein kinase receptor UFO                                   | 4.3 |
| HTRA2   | Serine protease HTRA2, mitochondrial                                   | 4.2 |
| VAV2    | Guanine nucleotide exchange factor VAV2                                | 3.9 |
| DCUN1D5 | DCN1-like protein 5                                                    | 3.9 |
| HAL     | Histidine ammonia-lyase                                                | 3.9 |
| TNS1    | Tensin-1                                                               | 3.8 |
| MINDY3  | Ubiquitin carboxyl-terminal hydrolase MINDY-3                          | 3.8 |
| DDC     | Aromatic-L-amino-acid decarboxylase                                    | 3.7 |
| MAP2K3  | Dual specificity mitogen-activated protein kinase kinase 3             | 3.7 |
| DPT     | Dermatopontin                                                          | 3.6 |
| SEC24D  | Protein transport protein Sec24D                                       | 3.5 |
| KDM1A   | Lysine-specific histone demethylase 1A                                 | 3.5 |
| AFAP1   | Actin filament-associated protein 1                                    | 3.4 |
| CPSF1   | Cleavage and polyadenylation specificity factor subunit 1              | 3.4 |
| ZFP36L2 | mRNA decay activator protein ZFP36L2                                   | 3.3 |
| ACSM3   | Acyl-coenzyme A synthetase ACSM3, mitochondrial                        | 3.1 |
| HDAC6   | Histone deacetylase 6                                                  | 3.1 |
| AGPAT1  | 1-acyl-sn-glycerol-3-phosphate acyltransferase alpha                   | 3.1 |
| VTI1A   | Vesicle transport through interaction with t-SNAREs homolog 1A         | 3.0 |
| AP1S1   | AP-1 complex subunit sigma-1A                                          | 2.9 |
| FILIP1L | Filamin A-interacting protein 1-like                                   | 2.9 |
| SNTB2   | Beta-2-syntrophin                                                      | 2.8 |
| DCN     | Decorin                                                                | 2.6 |
| HO1     | Heme oxygenase 1                                                       | 2.5 |
| FAF1    | FAS-associated factor 1                                                | 1.8 |

<sup>1</sup> Proteins passed both peptide false discovery rate (FDR, cutoff < 1%) and protein FDR (cutoff < 1%) were detected. Among all 318 upregulated proteins ( $\geq 1.5$ -fold change), top 50 upregulated proteins, and three proteins, DCN (2.6-fold), HO1 (2.5-fold) and FAF1 (1.8-fold) were showed. <sup>2</sup> Fold change in human protein expressions in whole tumor tissue of PC-PDX mice with Fx-high diet administration (group 1) compared to that of control mice (group 3). Proteins colored gray were the proteins that were applied to western blot analysis as noteworthy cancer-related molecules (Figure 4).

**Supplementary Table S5.** Profile of downregulated proteins identified by LC-MS/MS in whole tumor tissue of patient-derived pancreatic cancer tissue-transplanted xenograft (PC-PDX) mice administered fucoxanthin (Fx).<sup>1</sup>

| Gene symbol | Description                                | Fold change <sup>2</sup> |
|-------------|--------------------------------------------|--------------------------|
| INSR        | Insulin receptor                           | N.D. <sup>3</sup>        |
| BAG1        | BAG family molecular chaperone regulator 1 | N.D.                     |
| NTS         | Neurotensin/neuromedin N                   | N.D.                     |
| MT2A        | Metallothionein-2                          | N.D.                     |
| ITGB3       | Integrin beta-3                            | N.D.                     |

|         |                                                             |       |
|---------|-------------------------------------------------------------|-------|
| TNIP1   | TNFAIP3-interacting protein 1                               | N.D.  |
| CCDC12  | Coiled-coil domain-containing protein 12                    | N.D.  |
| SIPA1L3 | Signal-induced proliferation-associated 1-like protein 3    | N.D.  |
| RTN2    | Reticulon-2                                                 | N.D.  |
| MAP3K7  | Mitogen-activated protein kinase kinase kinase 7            | N.D.  |
| IL1R2   | Interleukin-1 receptor type 2                               | N.D.  |
| CD47    | Leukocyte surface antigen CD47                              | N.D.  |
| VEZT    | Vezatin                                                     | N.D.  |
| TUFT1   | Tuftelin                                                    | N.D.  |
| WDR49   | WD repeat-containing protein 49                             | N.D.  |
| CEMIP2  | Cell surface hyaluronidase                                  | N.D.  |
| HRNR    | Hornerin                                                    | N.D.  |
| IFIT5   | Interferon-induced protein with tetratricopeptide repeats 5 | N.D.  |
| TTK     | Dual specificity protein kinase TTK                         | −10.2 |
| CTDSPL2 | CTD small phosphatase-like protein 2                        | −7.6  |
| TGFB1   | Transforming growth factor beta-1 proprotein                | −6.0  |
| SCFD2   | Sec1 family domain-containing protein 2                     | −5.5  |
| LPXN    | Leupaxin                                                    | −4.7  |
| LAMTOR2 | Ragulator complex protein LAMTOR2                           | −4.4  |
| IGFBP3  | Insulin-like growth factor-binding protein 3                | −4.0  |
| MIF     | Macrophage migration inhibitory factor                      | −3.8  |
| TFF3    | Trefoil factor 3                                            | −3.8  |
| TFCP2L1 | Transcription factor CP2-like protein 1                     | −3.7  |
| ITGA1   | Integrin alpha-1                                            | −3.6  |
| TERF2IP | Telomeric repeat-binding factor 2-interacting protein 1     | −3.6  |
| LAMA5   | Laminin subunit alpha-5                                     | −3.2  |
| REG4    | Regenerating islet-derived protein 4                        | −3.2  |
| SP3     | Transcription factor Sp3                                    | −3.1  |
| NECTIN2 | Nectin-2                                                    | −3.1  |
| ECM1    | Extracellular matrix protein 1                              | −3.0  |
| MUC5B   | Mucin-5B                                                    | −2.8  |
| HNF4A   | Hepatocyte nuclear factor 4-alpha                           | −2.7  |
| PCID2   | PCI domain-containing protein 2                             | −2.5  |
| GPX2    | Glutathione peroxidase 2                                    | −2.5  |
| NFKB1   | Nuclear factor NF-kappa-B p105 subunit                      | −2.4  |
| NFKB2   | Nuclear factor NF-kappa-B p100 subunit                      | −2.3  |
| CLU     | Clusterin                                                   | −2.3  |
| IGFBP2  | Insulin-like growth factor-binding protein 2                | −2.3  |
| ABRACL  | Costars family protein ABRACL                               | −2.3  |
| AAGAB   | Alpha- and gamma-adaptin-binding protein p34                | −2.2  |
| CNOT2   | CCR4-NOT transcription complex subunit 2                    | −2.2  |
| SEC62   | Translocation protein SEC62                                 | −2.1  |

|          |                                                                |      |
|----------|----------------------------------------------------------------|------|
| ZMYND8   | Protein kinase C-binding protein 1                             | −2.1 |
| SYNE2    | Nesprin-2                                                      | −2.1 |
| CMC1     | COX assembly mitochondrial protein homolog                     | −2.1 |
| CFL2     | Cofilin-2                                                      | −2.1 |
| FKBP5    | Peptidyl-prolyl cis-trans isomerase FKBP5                      | −2.1 |
| PROM1    | Prominin-1                                                     | −2.0 |
| PIEZO1   | Piezo-type mechanosensitive ion channel component 1            | −2.0 |
| VSNL1    | Visinin-like protein 1                                         | −2.0 |
| SCIN     | Adseverin                                                      | −2.0 |
| OCLN     | Occludin                                                       | −1.9 |
| UXT      | Protein UXT                                                    | −1.9 |
| GATA6    | Transcription factor GATA-6                                    | −1.9 |
| ITGA3    | Integrin alpha-3                                               | −1.9 |
| COL17A1  | Collagen alpha-1(XVII) chain                                   | −1.9 |
| CST3     | Cystatin-C                                                     | −1.9 |
| PKP2     | Plakophilin-2                                                  | −1.9 |
| CD44     | CD44 antigen                                                   | −1.9 |
| XRCC4    | DNA repair protein XRCC4                                       | −1.9 |
| FXSD3    | FXSD domain-containing ion transport regulator 3               | −1.9 |
| LAMTOR5  | Ragulator complex protein LAMTOR5                              | −1.9 |
| CD55     | Complement decay-accelerating factor                           | −1.9 |
| NCAPH    | Condensin complex subunit 2                                    | −1.9 |
| CDC42EP5 | Cdc42 effector protein 5                                       | −1.8 |
| AGRN     | Agrin                                                          | −1.8 |
| TIMP1    | Metalloproteinase inhibitor 1                                  | −1.8 |
| LCN2     | Neutrophil gelatinase-associated lipocalin                     | −1.8 |
| PPP1R1B  | Protein phosphatase 1 regulatory subunit 1B                    | −1.7 |
| QSOX1    | Sulphydryl oxidase 1                                           | −1.7 |
| ADAM17   | Disintegrin and metalloproteinase domain-containing protein 17 | −1.7 |
| RASAL1   | RasGAP-activating-like protein 1                               | −1.7 |
| NFATC2IP | NFATC2-interacting protein                                     | −1.7 |
| FAM83B   | Protein FAM83B                                                 | −1.7 |
| HNF1B    | Hepatocyte nuclear factor 1-beta                               | −1.7 |
| MDK      | Midkine                                                        | −1.7 |
| DKK1     | Dickkopf-related protein 1                                     | −1.7 |
| MAPK13   | Mitogen-activated protein kinase 13                            | −1.7 |
| FHL2     | Four and a half LIM domains protein 2                          | −1.7 |
| PTGES2   | Prostaglandin E synthase 2                                     | −1.7 |
| EPCAM    | Epithelial cell adhesion molecule                              | −1.7 |
| GRN      | Progranulin                                                    | −1.7 |
| RHOC     | Rho-related GTP-binding protein RhoC                           | −1.7 |
| MMP9     | Matrix metalloproteinase-9                                     | −1.7 |

|         |                                                                   |      |
|---------|-------------------------------------------------------------------|------|
| CD99    | CD99 antigen                                                      | -1.7 |
| DAG1    | Dystroglycan 1                                                    | -1.7 |
| PTP4A1  | Protein tyrosine phosphatase type IVA 1                           | -1.7 |
| ANKRD22 | Ankyrin repeat domain-containing protein 22                       | -1.7 |
| NUCKS1  | Nuclear ubiquitous casein and cyclin-dependent kinase substrate 1 | -1.6 |
| MUC5AC  | Mucin-5AC                                                         | -1.6 |
| OXR1    | Oxidation resistance protein 1                                    | -1.6 |
| RPA3    | Replication protein A 14 kDa subunit                              | -1.6 |
| STUB1   | E3 ubiquitin-protein ligase CHIP                                  | -1.6 |
| SUMO3   | Small ubiquitin-related modifier 3                                | -1.6 |
| TGFB1I1 | Transforming growth factor beta-1-induced transcript 1 protein    | -1.6 |
| MSLN    | Mesothelin                                                        | -1.6 |
| LTBR    | Tumor necrosis factor receptor superfamily member 3               | -1.6 |
| HAT1    | Histone acetyltransferase type B catalytic subunit                | -1.6 |
| CDK9    | Cyclin-dependent kinase 9                                         | -1.6 |
| GAB1    | GRB2-associated-binding protein 1                                 | -1.6 |
| COL15A1 | Collagen alpha-1(XV) chain                                        | -1.6 |
| F11R    | Junctional adhesion molecule A                                    | -1.5 |
| CDH3    | Cadherin-3                                                        | -1.5 |
| CAT     | Catalase                                                          | -1.5 |

<sup>1</sup> Proteins passed both peptide false discovery rate (FDR, cutoff < 1%) and protein FDR (cutoff < 1%) were detected. Among all 888 downregulated proteins ( $\leq -1.5$ -fold change), 109 downregulated involving in proteins growth, inflammation, and cancer development, were showed. <sup>2</sup> Fold change in human protein expressions in whole tumor tissue of PC-PDX mice with Fx-high diet administration (group 1) compared to that of control mice (group 3). <sup>3</sup> N.D., Proteins were not detected in group 1 and detected in group 3. Proteins colored gray were the proteins that were applied to western blot analysis as noteworthy cancer-related molecules (Figure 4).
